# Supplementary material for: Patients with Advanced Pancreatic Cancer Treated with Mistletoe and Hyperthermia in Addition to Palliative Chemotherapy: A Retrospective Single-Center Analysis
Source: Cancers (Basel). 2023 Oct 11;15(20):4929. doi: 10.3390/cancers15204929 (PMC10605673; doi:10.3390/cancers15204929)
Supplement: Supplementary file 1 [file cancers-15-04929-s001.zip › cancers-2571042-supplementary.pdf]

**Supplemental Table S1: Survival of n = 142 patients with advanced pancreatic cancer receiving chemotherapy in dependence of an additional integrative therapeutic approach**

|                                          | <i>Median survival<br/>(months)</i> | <i>1-year<br/>survival rate (%)</i> | <i>2-year<br/>survival rate (%)</i> | <i>5-year<br/>survival rate<br/>(%)</i> |
|------------------------------------------|-------------------------------------|-------------------------------------|-------------------------------------|-----------------------------------------|
| <b>Mistletoe and<br/>hyperthermia</b>    | 18.9<br>[15.2; 24.5]                | 77.4<br>[62.9; 86.8]                | 37.3<br>[23.5; 51.0]                | 9.2<br>[2.6; 21.0]                      |
| <b>Only mistletoe</b>                    | 11.2<br>[7.1; 14.2]                 | 44.7<br>[29.9; 58.5]                | 12.5<br>[4.6; 24.4]                 | 0<br>--                                 |
| <b>No mistletoe,<br/>no hyperthermia</b> | 8.6<br>[4.7; 15.4]                  | 33.8<br>[15.4; 53.2]                | 9.7<br>[1.7; 26.3]                  | 0<br>--                                 |

Survival times are given as months (median (range)) or percentage.

**Supplemental Table S2: Survival (patients with advanced pancreatic cancer receiving chemotherapy) in dependence of the time of initiation of the integrative therapy (early vs late after diagnosis)**

|                              |              | <i>Median<br/>survival<br/>(months)</i> | <i>1-year<br/>survival rate<br/>(%)</i> | <i>2-year<br/>survival rate<br/>(%)</i> | <i>5-year<br/>survival rate<br/>(%)</i> |
|------------------------------|--------------|-----------------------------------------|-----------------------------------------|-----------------------------------------|-----------------------------------------|
| <b>Mistletoe<br/>therapy</b> | <b>early</b> | 14.7<br>[7.1; 15.8]                     | 56.5<br>[40.1; 70.0]                    | 19.8<br>[8.8; 33.9]                     | 0<br>--                                 |
|                              | <b>late</b>  | 14.7<br>[12.8; 20.0]                    | 65.7<br>[51.1; 76.8]                    | 29.6<br>[17.7; 42.4]                    | 8.66<br>[2.5; 19.5]                     |
| <b>Hyperthermia</b>          | <b>early</b> | 16.0<br>[5.4; 22.6]                     | 58.8<br>[32.5; 77.8]                    | 26.1<br>[8.3; 48.6]                     | 0<br>--                                 |
|                              | <b>late</b>  | 23.5<br>[15.8; 26.4]                    | 87.6<br>[70.2; 95.2]                    | 43.4<br>[25.4; 60.1]                    | 14.9<br>[4.2; 31.7]                     |

Survival times are given as months (median (range)) or percentage.
